# Supplementary material
Source: PubMed Central journal article supplement (PMC3877738)
Supplement: NIHMS518150-supplement-Supplement.pdf [file NIHMS518150-supplement-Supplement.pdf]

Diversity of the human *LILRB3/A6* locus encoding a myeloid inhibitory and activating receptor pair. *Immunogenetics*. Arman A. Bashirova, Richard Apps, Nicolas Vince, Yelizaveta Mochalova, Xu G. Yu, and Mary Carrington. Corresponding author: Mary Carrington, Cancer and Inflammation Program, Laboratory of Experimental Immunology, SAIC-Frederick, Inc., Frederick National Laboratory for Cancer Research, Frederick, Maryland 21702, USA; Ragon Institute of MGH, MIT and Harvard, Boston, Massachusetts 02114, USA. E-mail: carringm@mail.nih.gov.

**Figure S1.** Alignment of cDNA fragment sequences for *LILRB3* (black) and *LILRA6* (blue) alleles. The sequences are based on cDNA cloning and spliced as NM\_006864 (*LILRB3*) and NM\_024318 (*LILRA6*) with the exception of *LILRA6\*10*, in which exon 5 was consistently absent. The *LILRA6* fragment that is not homologous to *LILRB3* is shown in red. Primer sequences are not included. Asterisks depict the polymorphic nucleotides corresponding to positions 1322-1323 in NM\_024318 shown in Figure 2. Start and stop codons are underlined.

|           | Exon 1     |            |            |            |                   |            |            |             | Exon 2     |            |  |
|-----------|------------|------------|------------|------------|-------------------|------------|------------|-------------|------------|------------|--|
| LILRB3*01 | GGCTCATCCC | TCTGCAGAGC | GCGGGGTCAC | CGGGAGGAGA | <u>CGCCATGACG</u> | CCCGCCCTCA | CAGCCCTGCT | CTGCCTTGGG  | CTGAGTCTGG | GCCCCAGGAC |  |
| LILRB3*02 | -----      | -----      | -----      | -----      | -----             | -----      | -----      | -----       | -----      | -----      |  |
| LILRB3*03 | -----      | -----      | -----      | -----      | -----             | -----      | -----      | -----       | -----      | -----      |  |
| LILRB3*04 | -----      | -----      | -----      | -----      | -----             | -----      | -----      | -----       | -----      | -----      |  |
| LILRB3*05 | -----      | -----      | -----      | -----      | -----             | -----      | -----      | -----       | -----      | -----      |  |
| LILRB3*06 | -----      | -----      | C-----     | -A-----    | -----C            | -----G     | -----      | -----A----- | -----      | -----      |  |
| LILRB3*07 | -----      | -----      | -----      | -----      | -----             | -----      | -----      | -----       | -----      | -----      |  |
| LILRB3*08 | -----      | -----      | -C-----    | -----      | -----             | -----      | -----      | -----       | -----      | -----      |  |
| LILRB3*09 | -----      | -----      | C-----     | -A-----    | -----C            | ---A-----G | -----      | -----A----- | -----      | -----      |  |
| LILRB3*10 | -----      | -----      | -----      | -----      | -----             | -----      | -----      | -----       | -----      | -----      |  |
| LILRB3*11 | -----      | -----      | -----      | -----      | -----             | -----      | -----      | -----       | -----      | -----      |  |
| LILRB3*12 | -----      | -----      | -----      | -----      | -----             | -----      | -----      | -----       | -----      | -----      |  |
| LILRB3*13 | -----      | -----      | -----      | -----      | -----             | -----      | -----      | -----       | -----      | -----      |  |
| LILRA6*01 | -----      | -----      | -----      | -----      | -----             | -----      | -----      | -----       | -----      | -----      |  |
| LILRA6*02 | -----      | -----      | C-----     | -A-----    | -----C            | ---A-----G | -----      | -----A----- | -----      | -----      |  |
| LILRA6*03 | -----      | -----      | -----      | -----      | -----             | -----      | -----      | -----       | -----      | -----      |  |
| LILRA6*04 | -----      | -----      | -C-----    | -----      | -----             | -----      | -----      | -----       | -----      | -----      |  |
| LILRA6*05 | -----      | -----      | -----      | -----      | -----             | -----      | -----      | -----       | -----      | -----      |  |
| LILRA6*06 | -----      | -----      | -----      | -----      | -----             | -----      | -----      | -----       | -----      | -----      |  |
| LILRA6*07 | -----      | -----      | -----      | -----      | -----             | -----      | -----      | -----       | -----      | -----      |  |
| LILRA6*08 | -----      | -----      | -----      | -----      | -----             | -----      | -----      | -----       | -----      | -----      |  |
| LILRA6*09 | -----      | -----      | -----      | -----      | -----             | -----      | -----      | -----       | -----      | -----      |  |
| LILRA6*10 | -----      | -----      | C-----     | -A-----    | -----C            | ---A-----G | -----      | -----A----- | -----      | -----      |  |
| LILRA6*11 | -----      | -----      | -----      | -----      | -----             | -----      | -----      | -----       | -----      | -----      |  |
| LILRA6*12 | -----      | -----      | -----      | -----      | -----             | -----      | -----      | -----       | -----      | -----      |  |
| LILRA6*13 | -----      | -----      | -----      | -----      | -----             | -----      | -----      | -----       | -----      | -----      |  |

Exon 3

|           |             |            |            |            |            |            |            |            |            |             |
|-----------|-------------|------------|------------|------------|------------|------------|------------|------------|------------|-------------|
| LILRB3*01 | CCGCGTGCAG  | GCAGGGCCCT | TCCCCAAACC | CACCCTCTGG | GCTGAGCCAG | GCTCTGTGAT | CAGCTGGGGG | AGCCCCGTGA | CCATCTGGTG | TCAGGGGAGC  |
| LILRB3*02 | -----       | -----      | -----      | -----      | -----      | -----      | -----      | -----      | -----      | -----       |
| LILRB3*03 | -----       | -----      | -----      | -----      | -----      | -----      | -----      | -----      | -----      | -----       |
| LILRB3*04 | -----A----- | -----      | -----      | -----      | -----      | -----      | -----      | -----      | -----      | -----       |
| LILRB3*05 | -----A----- | -----      | -----      | -----      | -----      | -----      | -----      | -----      | -----      | -----       |
| LILRB3*06 | -----A----- | -----      | -----      | -----      | -----      | -----      | -----      | -----      | -----      | -----       |
| LILRB3*07 | -----       | -----      | -----      | -----      | -----      | -----      | -----      | -----      | -----      | -----       |
| LILRB3*08 | -----       | -----      | -----      | -----      | -----      | -----      | -----      | -----      | -----      | -----       |
| LILRB3*09 | -----A----- | -----      | -----      | -----      | -----      | -----      | -----      | -----      | -----      | -----       |
| LILRB3*10 | -----A----- | -----      | -----      | -----      | -----      | -----      | -----      | -----      | -----      | -----A----- |
| LILRB3*11 | -----       | -----      | -----      | -----      | -----      | -----      | -----      | -----      | -----      | -----       |
| LILRB3*12 | -----       | -----      | -----      | -----      | -----      | -----      | -----      | -----      | -----      | -----       |
| LILRB3*13 | -----A----- | -----      | -----      | -----      | -----      | -----      | -----      | -----      | -----      | -----       |
| LILRA6*01 | -----       | -----      | -----      | -----      | -----      | -----      | -----      | -----      | -----      | -----       |
| LILRA6*02 | -----A----- | -----      | -----      | -----      | -----      | -----      | -----      | -----      | -----      | -----       |
| LILRA6*03 | -----       | -----      | -----      | -----      | -----      | -----      | -----      | -----      | -----      | -----       |
| LILRA6*04 | -----       | -----      | -----      | -----      | -----      | -----      | -----      | -----      | -----      | -----       |
| LILRA6*05 | -----       | -----      | -----      | -----      | -----      | -----      | -----      | -----      | -----      | -----       |
| LILRA6*06 | -----       | -----      | -----      | -----      | -----      | -----      | -----      | -----      | -----      | -----       |
| LILRA6*07 | -----       | -----      | -----      | -----      | -----      | -----      | -----      | -----      | -----      | -----       |
| LILRA6*08 | -----       | -----      | -----      | -----      | -----      | -----      | -----      | -----      | -----      | -----       |
| LILRA6*09 | -----       | -----      | -----      | -----      | -----      | -----      | -----      | -----      | -----      | -----       |
| LILRA6*10 | -----A----- | -----      | -----      | -----      | -----      | -----      | -----      | -----      | -----      | -----       |
| LILRA6*11 | -----       | -----      | -----      | -----      | -----      | -----      | -----      | -----      | -----      | -----       |
| LILRA6*12 | -----       | -----      | -----      | -----      | -----      | -----      | -----      | -----      | -----      | -----       |
| LILRA6*13 | -----       | -----      | -----      | -----      | -----      | -----      | -----      | -----      | -----      | -----       |

200

|           |           |             |            |            |             |            |            |            |           |            |
|-----------|-----------|-------------|------------|------------|-------------|------------|------------|------------|-----------|------------|
| LILRB3*01 | CTGGAGGCC | AGGAGTACCG  | ACTGGATAAA | GAGGGAAGCC | CAGAGCCCTT  | GGACAGAAAT | AACCCACTGG | AACCCAAGAA | CAAGCCAGA | TTCTCCATCC |
| LILRB3*02 | -----     | -----       | -----      | -----      | -----       | -----      | -----      | -----      | -----     | -----      |
| LILRB3*03 | -----     | -----A----- | -----      | -----      | -----       | -----      | -----      | -----      | -----     | -----      |
| LILRB3*04 | -----     | -----A----- | -----      | -----      | -----G----- | -----      | -----      | -----      | -----     | -----      |
| LILRB3*05 | -----     | -----A----- | -----      | -----      | -----G----- | -----      | -----      | -----      | -----     | -----      |
| LILRB3*06 | -----     | -----       | -----      | -----      | -----G----- | -----      | -----      | -----      | -----     | -----      |
| LILRB3*07 | -----     | -----A----- | -----      | -----      | -----G----- | -----      | -----      | -----      | -----     | -----      |
| LILRB3*08 | -----     | -----A----- | -----      | -----      | -----G----- | -----      | -----      | -----      | -----     | -----      |
| LILRB3*09 | -----     | -----       | -----      | -----      | -----G----- | -----      | -----      | -----      | -----     | -----      |
| LILRB3*10 | -----     | -----A----- | -----      | -----      | -----G----- | -----      | -----      | -----      | -----     | -----      |
| LILRB3*11 | -----     | -----       | -----      | -----      | -----       | -----      | -----      | -----      | -----     | -----      |
| LILRB3*12 | -----     | -----A----- | -----      | -----      | -----       | -----      | -----      | -----      | -----     | -----      |
| LILRB3*13 | -----     | -----A----- | -----      | -----      | -----G----- | -----      | -----      | -----      | -----     | -----      |
| LILRA6*01 | -----     | -----A----- | -----      | -----      | -----       | -----      | -----      | -----      | -----     | -----      |
| LILRA6*02 | -----     | -----       | -----      | -----      | -----G----- | -----      | -----      | -----      | -----     | -----      |
| LILRA6*03 | -----     | -----A----- | -----      | -----      | -----       | -----      | -----      | -----      | -----     | -----      |
| LILRA6*04 | -----     | -----A----- | -----      | -----      | -----G----- | -----      | -----      | -----      | -----     | -----      |
| LILRA6*05 | -----     | -----A----- | -----      | -----      | -----       | -----      | -----      | -----      | -----     | -----      |
| LILRA6*06 | -----     | -----A----- | -----      | -----      | -----       | -----      | -----      | -----      | -----     | -----      |
| LILRA6*07 | -----     | -----       | -----      | -----      | -----       | -----      | -----      | -----      | -----     | -----      |
| LILRA6*08 | -----     | -----A----- | -----      | -----      | -----       | -----      | -----      | -----      | -----     | -----      |
| LILRA6*09 | -----     | -----A----- | -----      | -----      | -----       | -----      | -----      | -----      | -----     | -----      |
| LILRA6*10 | -----     | -----       | -----      | -----      | -----       | -----      | -----      | -----      | -----     | -----      |
| LILRA6*11 | -----     | -----A----- | -----      | -----      | -----       | -----      | -----      | -----      | -----     | -----      |
| LILRA6*12 | -----     | -----A----- | -----      | -----      | -----       | -----      | -----      | -----      | -----     | -----      |
| LILRA6*13 | -----     | -----A----- | -----      | -----      | -----       | -----      | -----      | -----      | -----     | -----      |

300

|           |            |            |            |            |            |            |            |            |            |            |
|-----------|------------|------------|------------|------------|------------|------------|------------|------------|------------|------------|
| LILRB3*01 | CATCCATGAC | AGAGCACCAT | GCGGGGAGAT | ACCGCTGCCA | CTATTACAGC | TCTGCAGGCT | GGTCAGAGCC | CAGCGACCCC | CTGGAGCTGG | TGATGACAGG |
| LILRB3*02 | -----      | -----      | -----      | -----      | -----      | -----      | -----      | -----      | -----      | -----      |
| LILRB3*03 | -----      | -C-----    | --A-----   | -----      | -----      | -----      | -----      | -----      | -----      | -----      |
| LILRB3*04 | -----      | -----      | -A-----    | -----      | -----      | -----      | -----      | -----      | -----      | -----      |
| LILRB3*05 | -----      | -C-----    | -A-----    | -----      | -----      | -----      | -----      | -----      | -----      | -----      |
| LILRB3*06 | -----      | -A-----    | -----      | -----      | -----      | -----      | -----      | -----      | -----      | -----      |
| LILRB3*07 | -----      | -C-----    | -A-----    | -----      | -----      | -----      | -----      | -----      | -----      | -----      |
| LILRB3*08 | -----      | -----      | -A-----    | -----      | -----      | -----      | -----      | -----      | -----      | -----      |
| LILRB3*09 | -----      | -A-----    | -----      | -----      | -----      | -----      | -----      | -----      | -----      | -----      |
| LILRB3*10 | -----      | -C-----    | -A-----    | -----      | -----      | -----      | -----      | -----      | -----      | -----      |
| LILRB3*11 | -----      | -----      | -----      | -----      | -----      | -----      | -----      | -----      | -----      | -----      |
| LILRB3*12 | -----      | -C-----    | -A-----    | -----      | -----      | -----      | -----      | -----      | -----      | -----      |
| LILRB3*13 | -----      | -C-----    | -A-----    | -----      | -----      | -----      | -----      | -----      | -----      | -----      |
| LILRA6*01 | -----      | -C-----    | -A-----    | -----      | -----      | -----      | -----      | -----      | -----      | -C-----    |
| LILRA6*02 | -----      | -A-----    | -----      | -----      | -----      | -----      | -----      | -----      | -----      | -----      |
| LILRA6*03 | -----      | -C-----    | -A-----    | -----      | -----      | -----      | -----      | -----      | -----      | -----      |
| LILRA6*04 | -----      | -C-----    | -A-----    | -----      | -----      | -----      | -----      | -----      | -----      | -----      |
| LILRA6*05 | -----      | -C-----    | -A-----    | -----      | -----      | -----      | -----      | -----      | -----      | -----      |
| LILRA6*06 | -----      | -C-----    | -A-----    | -----      | -----      | -----      | -----      | -----      | -----      | -----      |
| LILRA6*07 | -----      | -C-----    | -A-----    | -----      | -----      | -----      | -----      | -----      | -----      | -----      |
| LILRA6*08 | -----      | -----      | -A-----    | -----      | -----      | -----      | -----      | -----      | -----      | -C-----    |
| LILRA6*09 | -----      | -C-----    | -A-----    | -----      | -----      | -----      | -----      | -----      | -----      | -----      |
| LILRA6*10 | -----      | -----      | -----      | -----      | -----      | -----      | -----      | -----      | -----      | -----      |
| LILRA6*11 | -----      | -----      | -----      | -----      | -----      | -----      | -----      | -----      | -----      | -----      |
| LILRA6*12 | -----      | -C-----    | -A-----    | -----      | -----      | -----      | -----      | -----      | -----      | -----      |
| LILRA6*13 | -----      | -C-----    | -A-----    | -----      | -----      | -----      | -----      | -----      | -----      | -C-----    |

400

|           |            |            |            |           |            |            |            |            |            |            |
|-----------|------------|------------|------------|-----------|------------|------------|------------|------------|------------|------------|
| LILRB3*01 | ATTCTACAAC | AAACCCACCC | TCTCAGCCCT | GCCAGCCCT | GTGGTGGCCT | CAGGGGGGAA | TATGACCCTC | CGATGTGGCT | CACAGAAGGG | ATATCACCAT |
| LILRB3*02 | -----      | -----      | -----      | -----     | -----      | -----      | -----      | -----      | -----      | -----      |
| LILRB3*03 | -GC---T-G- | -----      | -----      | -----     | -----      | -----      | -----      | -----      | -----      | -A-----    |
| LILRB3*04 | -----      | -----      | -----      | -----     | -----      | -----      | -----      | -----      | -----      | -----      |
| LILRB3*05 | -----      | -----      | -----      | -----     | -----      | -----      | -----      | -----      | -----      | -----      |
| LILRB3*06 | -GC---T-G- | -----      | -----      | -----     | -----      | -----      | -----      | -A-----    | -----      | -----      |
| LILRB3*07 | -----      | -----      | -----      | -----     | -----      | -----      | -----      | -----      | -----      | -----      |
| LILRB3*08 | -----      | -----      | -----      | -----     | -----      | -----      | -----      | -----      | -----      | -----      |
| LILRB3*09 | -GC---T-G- | -----      | -----      | -----     | -----      | -----      | -----      | -A-----    | -----      | -----      |
| LILRB3*10 | -----      | -----      | -----      | -----     | -----      | -----      | -----      | -----      | -----      | -----      |
| LILRB3*11 | -----      | -----      | -----      | -----     | -----      | -----      | -----      | -----      | -----      | -----      |
| LILRB3*12 | -GC---T-G- | -----      | -----      | -----     | -----      | -----      | -----      | -----      | -----      | -A-----    |
| LILRB3*13 | -----      | -----      | -----      | -----     | -----      | -----      | -----      | -----      | -----      | -----      |
| LILRA6*01 | -----      | -----      | -----      | -----     | -----      | -----      | -----      | -----      | -----      | -----      |
| LILRA6*02 | -GC---T-G- | -----      | -----      | -----     | -----      | -----      | -----      | -A-----    | -----      | -----      |
| LILRA6*03 | -----      | -----      | -----      | -----     | -----      | -----      | -----      | -----      | -----      | -----      |
| LILRA6*04 | -----      | -----      | -----      | -----     | -----      | -----      | -----      | -----      | -----      | -----      |
| LILRA6*05 | -----      | -----      | -----      | -----     | -----      | -----      | -----      | -----      | -----      | -----      |
| LILRA6*06 | -----      | -----      | -----      | -----     | -----      | -----      | -----      | -----      | -----      | -----      |
| LILRA6*07 | -GC---G-   | -----      | -----      | -----     | -----      | -----      | -----      | -----      | -----      | -G-----    |
| LILRA6*08 | -----      | -----      | -----      | -----     | -----      | -----      | -----      | -----      | -----      | -----      |
| LILRA6*09 | -----      | -----      | -----      | -----     | -----      | -----      | -----      | -----      | -----      | -----      |
| LILRA6*10 | -GC---T-G- | -----      | -----      | -----     | -----      | -----      | -----      | -----      | -----      | -----      |
| LILRA6*11 | -GC---G-   | -----      | -----      | -----     | -----      | -----      | -----      | -----      | -----      | -G-----    |
| LILRA6*12 | -----      | -----      | -----      | -----     | -----      | -----      | -----      | -----      | -----      | -----      |
| LILRA6*13 | -----      | -----      | -----      | -----     | -----      | -----      | -----      | -----      | -----      | -----      |

500

|           |             |            |            |            |            |            |            |           |            |            |
|-----------|-------------|------------|------------|------------|------------|------------|------------|-----------|------------|------------|
| LILRB3*01 | TTTGTCTCTGA | TGAAGGAAGG | AGAACACCAG | CTCCCCCGGA | CCCTGGACTC | ACAGCAGCTC | CACAGTGGGG | GGTTCAGGC | CCTGTTCCCT | GTGGGCCCCG |
| LILRB3*02 | -----       | -----      | -----      | -----      | -----      | -----      | -----      | -----     | -----      | -----      |
| LILRB3*03 | -----       | -----      | -----      | -----      | -----      | -----      | -----      | -----     | -----      | -----      |
| LILRB3*04 | -----       | -----      | -----      | -----      | -----      | -----      | -----      | -----     | -----      | -----      |
| LILRB3*05 | -----       | -----      | -----      | -----      | -----      | -----      | -----      | -----     | -----      | -----      |
| LILRB3*06 | -----       | -----      | -----      | -----      | -----      | -----      | -----      | -----     | -----      | -----      |
| LILRB3*07 | -----       | -----      | -----      | -----      | -----      | -----      | -----      | -----     | -----      | -----      |
| LILRB3*08 | -----       | -----      | -----      | -----      | -----      | -----      | -----      | -----     | -----      | -----      |
| LILRB3*09 | -----       | -----      | -----      | -----      | -----      | -----      | -----      | -----     | -----      | -----      |
| LILRB3*10 | -----       | -----      | -----      | -----      | -----      | -----      | -----      | -----     | -----      | -----      |
| LILRB3*11 | -----       | -----      | -----      | -----      | -----      | -----      | -----      | -----     | -----      | -----      |
| LILRB3*12 | -----       | -----      | -----      | -----      | -----      | -----      | -----      | -----     | -----      | -----      |
| LILRB3*13 | -----       | -----      | -----      | -----      | -----      | -----      | -----      | -----     | -----      | -----      |
| LILRA6*01 | -----       | -----      | -----      | -----      | -----      | -----      | -----      | -----     | -----      | -----      |
| LILRA6*02 | -----       | -----      | -----      | -----      | -----      | -----      | -----      | -----     | -----      | -----      |
| LILRA6*03 | -----       | -----      | -----      | -----      | -----      | -----      | -----      | -----     | -----      | -----      |
| LILRA6*04 | -----       | -----      | -----      | -----      | -----      | -----      | -----      | -----     | -----      | -----      |
| LILRA6*05 | -----       | -----      | -----      | -----      | -----      | -----      | -----      | -----     | -----      | -----      |
| LILRA6*06 | -----       | -----      | -----      | -----      | -----      | -----      | -----      | -----     | -----      | -----      |
| LILRA6*07 | -----       | -----      | -----      | -----      | -----      | -----      | -----      | -----     | -----      | -----      |
| LILRA6*08 | -----       | -----      | -----      | -----      | -----      | -----      | -----      | -----     | -----      | -----      |
| LILRA6*09 | -----       | -----      | -----      | -----      | -----      | -----      | -----      | -----     | -----      | -----      |
| LILRA6*10 | -----       | -----      | -----      | -----      | -----      | -----      | -----      | -----     | -----      | -----      |
| LILRA6*11 | -----       | -----      | -----      | -----      | -----      | -----      | -----      | -----     | -----      | -----      |
| LILRA6*12 | -----       | -----      | -----      | -----      | -----      | -----      | -----      | -----     | -----      | -----      |
| LILRA6*13 | -----       | -----      | -----      | -----      | -----      | -----      | -----      | -----     | -----      | -----      |

600

|           |           |            |           |            |            |           |            |            |            |            |
|-----------|-----------|------------|-----------|------------|------------|-----------|------------|------------|------------|------------|
| LILRB3*01 | TGAACCCAG | CCACAGGTGG | AGGTTACAT | GCTATTACTA | TTATATGAAC | ACCCCCAGG | TGTGGTCCCA | CCCCAGTGAC | CCCCTGGAGA | TTCTGCCCTC |
| LILRB3*02 | -----     | -----      | -----     | -----      | -----      | -----     | -----      | -----      | -----      | -----      |
| LILRB3*03 | -----     | -----      | -----     | -----      | -----      | -----     | -----      | -----      | -----      | -----      |
| LILRB3*04 | --C-----  | -----      | -----     | -----      | ---CA---   | -----G-   | -----TG-   | -----      | -----      | -----      |
| LILRB3*05 | --C-----  | -----      | -----     | -----      | ---CA---   | -----TG-  | -----      | -----      | -----      | -----      |
| LILRB3*06 | -----     | -----      | -----G-   | -----      | -----      | -----G-   | -----      | -----      | -----      | -----      |
| LILRB3*07 | --C-----  | -----      | -----     | -----      | ---CA---   | -----G-   | -----      | -----      | -----      | -----      |
| LILRB3*08 | --C-----  | -----      | -----     | -----      | ---CA---   | -----G-   | -----      | -----      | -----      | -----      |
| LILRB3*09 | -----     | -----      | -----     | -----      | -----      | -----G-   | -----      | -----      | -----      | -----      |
| LILRB3*10 | --C-----  | -----      | -----     | -----      | ---CA---   | -----TG-  | -----      | -----      | -----      | -----      |
| LILRB3*11 | -----     | -----      | -----     | -----      | -----      | -----G-   | -----      | -----      | -----      | -----      |
| LILRB3*12 | -----     | -----      | -----     | -----      | -----      | -----G-   | -----      | -----      | -----      | -----      |
| LILRB3*13 | --C-----  | -----      | -----     | -----      | ---CA---   | -----TG-  | -----      | -----      | -----      | -----      |
| LILRA6*01 | --C-----  | -----      | -----     | -----      | ---CA---   | -----G-   | -----      | -----      | -----      | -----      |
| LILRA6*02 | -----     | -----      | -----     | -----      | -----      | -----G-   | -----      | -----      | -----      | -----      |
| LILRA6*03 | --C-----  | -----      | -----     | -----      | ---CA---   | -----G-   | -----      | -----      | -----      | -----      |
| LILRA6*04 | --C-----  | -----      | -----     | -----      | ---CA---   | -----TG-  | -----      | -----      | -----      | -----      |
| LILRA6*05 | --C-----  | -----      | -----     | -----      | ---CA---   | -----G-   | -----      | -----      | -----      | -----      |
| LILRA6*06 | --C-----  | -----      | -----     | -----      | ---CA---   | -----G-   | -----      | -----      | -----      | -----      |
| LILRA6*07 | --C-----  | -----      | -----     | -----      | ---CA---   | -----     | -----      | -----      | -----      | -----      |
| LILRA6*08 | --C-----  | -----      | -----     | -----      | ---CA---   | -----G-   | -----      | -----      | -----      | -----      |
| LILRA6*09 | --C-----  | -----      | -----     | -----      | ---CA---   | -----G-   | -----      | -----      | -----      | -----      |
| LILRA6*10 | --C-----  | -----      | -----     | -----      | ---CA---   | -----     | -----      | -----      | -----      | -----      |
| LILRA6*11 | --C-----  | -----      | -----     | -----      | ---CA---   | -----G-   | -----      | -----      | -----      | -----      |
| LILRA6*12 | --C-----  | -----      | -----     | -----      | ---CA---   | -----     | -----      | -----      | -----      | -----      |
| LILRA6*13 | --C-----  | -----      | -----     | -----      | ---CA---   | -----G-   | -----      | -----      | -----      | -----      |

700



|           |             |            |            |            |            |            |            |            |            |            |
|-----------|-------------|------------|------------|------------|------------|------------|------------|------------|------------|------------|
| L1LRB3*01 | TGAGCCGCTC  | CCACGGGGGC | CAGTACAGGT | GCTATGGTGC | ACACAACCTC | TCCTCCGAGT | GGTCGGCCCC | CAGCGACCCC | CTGAACATCC | TGATGGCAGG |
| L1LRB3*02 | -----C----- |            |            |            |            |            |            |            |            |            |
| L1LRB3*03 | -----C----- | -A-T-----  |            |            |            |            |            |            |            |            |
| L1LRB3*04 | -----C----- | -A-T-----  |            |            |            |            |            |            |            |            |
| L1LRB3*05 | -----C----- | -T-----    |            |            |            |            |            | -T-----    | -G-----    | -CA-----   |
| L1LRB3*06 | -----C----- |            |            |            |            |            |            |            |            |            |
| L1LRB3*07 | -----C----- | -T-----    |            |            |            |            |            |            | -G-----    | -CA-----   |
| L1LRB3*08 | -----C----- | -T-----    |            |            |            |            |            |            | -G-----    | -CA-----   |
| L1LRB3*09 | -----C----- |            |            |            |            |            |            |            |            |            |
| L1LRB3*10 | -----C----- | -T-----    |            |            |            |            |            | -T-----    | -G-----    | -CA-----   |
| L1LRB3*11 | -----C----- |            |            |            |            |            |            |            |            |            |
| L1LRB3*12 | -----C----- | -A-T-----  |            |            |            |            |            |            |            |            |
| L1LRB3*13 | -----C----- | -T-----    |            |            |            |            |            | -T-----    | -G-----    | -CA-----   |
| L1LRA6*01 | -----C----- |            |            |            |            |            |            |            |            |            |
| L1LRA6*02 | -----C----- |            |            |            |            |            |            |            |            |            |
| L1LRA6*03 | -----C----- |            |            |            |            |            |            |            |            |            |
| L1LRA6*04 | -----C----- |            |            |            |            |            |            |            |            |            |
| L1LRA6*05 | -----C----- |            |            |            |            |            |            | -T-----    |            |            |
| L1LRA6*06 | -----C----- |            |            |            |            |            |            |            |            |            |
| L1LRA6*07 | -----C----- |            |            |            |            |            |            |            |            |            |
| L1LRA6*08 | -----C----- |            |            |            |            |            |            |            |            |            |
| L1LRA6*09 | -----C----- |            |            |            |            |            |            |            |            |            |
| L1LRA6*10 | .....       | .....      | .....      | .....      | .....      | .....      | .....      | .....      | .....      | .....      |
| L1LRA6*11 | -----C----- |            |            |            |            |            |            |            |            |            |
| L1LRA6*12 | -----C----- |            |            |            |            |            |            |            |            |            |
| L1LRA6*13 | -----C----- |            | -A-----    | -C-----    |            |            |            |            |            |            |

1000

|           |            |            |            |            |            |            |            |            |            |            |
|-----------|------------|------------|------------|------------|------------|------------|------------|------------|------------|------------|
| L1LRB3*01 | ACAGATCTAT | GACACCGTCT | CCCTGTCAGC | ACAGCCGGGC | CCCACAGTGG | CCTCAGGAGA | GAACGTGACC | CTGCTGTGTC | AGTCATGGTG | GCAGTTTGAC |
| L1LRB3*02 | -----      | -----      | -----      | -----      | -----      | -----      | -----      | -----      | -----      | -----      |
| L1LRB3*03 | -----      | -----      | -----      | -----      | -----      | -----      | -----      | -----      | -----      | -----      |
| L1LRB3*04 | -----      | -----      | -----      | -----      | -----      | -----      | -----      | -----      | -----      | -----      |
| L1LRB3*05 | -----      | -----      | -----      | -----      | -----      | -----      | -A-----    | -----      | -C-G-----  | -T-T-----  |
| L1LRB3*06 | -----      | -----      | -----      | -----      | -----      | -----      | -----      | -----      | -----      | -----      |
| L1LRB3*07 | -----      | -----      | -----      | -----      | -----      | -----      | -----      | -----      | -----      | -----      |
| L1LRB3*08 | -----      | -----      | -----      | -----      | -----      | -----      | -A-----    | -----      | -C-G-----  | -T-T-----  |
| L1LRB3*09 | -----      | -----      | -----      | -----      | -----      | -----      | -----      | -----      | -----      | -----      |
| L1LRB3*10 | -----      | -----      | -----      | -----      | -----      | -----      | -A-----    | -----      | -C-G-----  | -T-T-----  |
| L1LRB3*11 | -----      | -----      | -----      | -----      | -----      | -----      | -----      | -----      | -----      | -----      |
| L1LRB3*12 | -----      | -----      | -----      | -----      | -----      | -----      | -----      | -----      | -----      | -----      |
| L1LRB3*13 | -----      | -----      | -----      | -----      | -----      | -----      | -A-----    | -----      | -C-G-----  | -T-T-----  |
| L1LRA6*01 | -----      | -----      | -----      | -----      | -----      | -----      | -----      | -----      | -C-G-----  | TT-T-----  |
| L1LRA6*02 | -----      | -----      | -----      | -----      | -----      | -----      | -----      | -----      | -----      | -----      |
| L1LRA6*03 | -----      | -----      | -----      | -----      | -----      | -----      | -----      | -----      | -C-G-----  | TT-T-----  |
| L1LRA6*04 | -----      | -----      | -----      | -----      | -----      | -----      | -----      | -----      | -C-G-----  | TT-T-----  |
| L1LRA6*05 | -----      | -----      | -----      | -----      | -----      | -----      | -----      | -----      | -C-G-----  | TT-T-----  |
| L1LRA6*06 | -----      | -----      | -----      | -----      | -----      | -----      | -----      | -----      | -C-G-----  | TT-T-----  |
| L1LRA6*07 | -----      | -----      | -----      | -----      | -----      | -----      | -----      | -----      | -----      | -----      |
| L1LRA6*08 | -----      | -----      | -----      | -----      | -----      | -----      | -----      | -----      | -C-G-----  | TT-T-----  |
| L1LRA6*09 | -----      | -----      | -----      | -----      | -----      | -----      | -----      | -----      | -C-G-----  | TT-T-----  |
| L1LRA6*10 | -----      | -----      | -----      | -----      | -----      | -----      | -----      | -----      | -----      | -----      |
| L1LRA6*11 | -----      | -----      | -----      | -----      | -----      | -----      | -----      | -----      | -----      | -----      |
| L1LRA6*12 | -----      | -----      | -----      | -----      | -----      | -----      | -----      | -----      | -C-G-----  | TT-T-----  |
| L1LRA6*13 | -----      | -----      | -----      | -----      | -----      | -----      | -----      | -----      | -C-G-----  | TT-T-----  |

1100

|           |            |            |            |           |            |            |            |            |            |            |
|-----------|------------|------------|------------|-----------|------------|------------|------------|------------|------------|------------|
| LILRB3*01 | ACTTTCCTTC | TGACCAAAGA | AGGGGCAGCC | CATCCCCAC | TGCGTCTGAG | ATCAATGTAC | GGAGCTCATA | AGTACCAGGC | TGAATTCCCC | ATGAGTCTCG |
| LILRB3*02 | -----      | -----      | -----      | -----     | -----      | -----      | -----      | -----      | -----      | -----      |
| LILRB3*03 | -----      | -----      | -----      | -----     | -----      | -----      | -----      | -----      | -----      | -----      |
| LILRB3*04 | -----      | -----      | -----      | -----     | -----      | -----      | -----      | -----      | -----      | -----      |
| LILRB3*05 | -----      | -----      | -----      | -----     | -----      | -----      | -----      | -----      | -----      | -----      |
| LILRB3*06 | -----      | -----      | -----      | -----     | -----      | -----      | -----      | -----      | -----      | -----      |
| LILRB3*07 | -----      | -----      | -----      | -----     | -----      | -----      | -----      | -----      | -----      | -----      |
| LILRB3*08 | -----      | -----      | -----      | -----     | -----      | -----      | -----      | -----      | -----      | -----      |
| LILRB3*09 | -----      | -----      | -----      | -----     | -----      | -----      | -----      | -----      | -----      | -----      |
| LILRB3*10 | -----      | -----      | -----      | -----     | -----      | -----      | -----      | -----      | -----      | -----      |
| LILRB3*11 | -----      | -----      | -----      | -----     | -----      | -----      | -----      | -----      | -----      | -----      |
| LILRB3*12 | -----      | -----      | -----      | -----     | -----      | -----      | -----      | -----      | -----      | -----      |
| LILRB3*13 | -----      | -----      | -----      | -----     | -----      | -----      | -----      | -----      | -----      | -----      |
| LILRA6*01 | -----      | -----      | -----      | -----     | -----      | -----      | -----      | -----      | -----      | -----      |
| LILRA6*02 | -----      | -----      | -----      | -----     | -----      | -----      | -----      | -----      | -----      | -----      |
| LILRA6*03 | -----      | -----      | -----      | -----     | -----      | -----      | -----      | -----      | -----      | -----      |
| LILRA6*04 | -----      | -----      | -----      | -----     | -----      | -----      | -----      | -----      | -----      | -----      |
| LILRA6*05 | -----      | -----      | -----      | -----     | -----      | -----      | -----      | -----      | -----      | -----      |
| LILRA6*06 | -----      | -----      | -----      | -----     | -----      | -----      | -----      | -----      | -----      | -----      |
| LILRA6*07 | -----      | -----      | -----      | -----     | -----      | -----      | -----      | -----      | -----      | -----      |
| LILRA6*08 | -----      | -----      | -----      | -----     | -----      | -----      | -----      | -----      | -----      | -----      |
| LILRA6*09 | -----      | -----      | -----      | -----     | -----      | -----      | -----      | -----      | -----      | -----      |
| LILRA6*10 | -----      | -----      | -----      | -----     | -----      | -----      | -----      | -----      | -----      | -----      |
| LILRA6*11 | -----      | -----      | -----      | -----     | -----      | -----      | -----      | -----      | -----      | -----      |
| LILRA6*12 | -----      | -----      | -----      | -----     | -----      | -----      | -----      | -----      | -----      | -----      |
| LILRA6*13 | -----      | -----      | -----      | -----     | -----      | -----      | -----      | -----      | -----      | -----      |

1200

|           |            |            |            |            |            |            |            |            |            |             |
|-----------|------------|------------|------------|------------|------------|------------|------------|------------|------------|-------------|
|           |            |            |            |            | **         |            |            |            |            |             |
| LILRB3*01 | TGACCTCAGC | CCACGCGGGG | ACCTACAGGT | GCTACGGCTC | ATACAGCTCC | AACCCCCACC | TGCTGTCTTT | CCCCAGTGAG | CCCCTGGAAC | TCATGGTCTC  |
| LILRB3*02 | -----      | -----      | -----      | -----      | -----      | -----      | -----CA    | -----      | -----      | -----       |
| LILRB3*03 | -----      | -----      | -----      | -----      | -CG-----   | -----T---  | -----CA    | -----      | -----G-    | -----G----- |
| LILRB3*04 | -----      | -----      | -----      | -----      | -CG-----   | -----      | -----CA    | -----      | -----G-    | -----G----- |
| LILRB3*05 | -----      | -----      | -----      | -----      | -CG-----   | -----      | -----      | -----      | -----      | -----       |
| LILRB3*06 | -----      | -----      | -----      | -----      | -CG-----   | -----      | -----CA    | -----      | -----      | -----       |
| LILRB3*07 | -----      | -----      | -----      | -----      | -CG-----   | -----      | -----      | -----      | -----      | -----       |
| LILRB3*08 | -----      | -----      | -----      | -----      | -----      | -----T---  | -----      | -----      | -----G-    | -----G----- |
| LILRB3*09 | -----      | -----      | -----      | -----      | -CG-----   | -----      | -----      | -----      | -----      | -----       |
| LILRB3*10 | -----      | -----      | -----      | -----      | -CG-----   | -----      | -----      | -----      | -----      | -----       |
| LILRB3*11 | -----      | -----      | -----      | -----      | -CG-----   | -----      | -----      | -----      | -----      | -----       |
| LILRB3*12 | -----      | -----      | -----      | -----      | -CG-----   | -----T---  | -----CA    | -----      | -----G-    | -----G----- |
| LILRB3*13 | -----      | -----      | -----      | -----      | -CG-----   | -----      | -----      | -----      | -----      | -----       |
| LILRA6*01 | -----      | -----      | -----      | -----      | -----      | -----      | -----      | -----      | -----      | -----       |
| LILRA6*02 | -----      | -----      | -----      | -----      | -----      | -----      | -----      | -----      | -----      | -----       |
| LILRA6*03 | -----      | -----      | -----      | -----      | -----      | -----      | -----      | -----      | -----      | -----       |
| LILRA6*04 | -----      | -----      | -----      | -----      | -CG-----   | -----      | -----CA    | -----      | -----G-    | -----       |
| LILRA6*05 | -----      | -----      | -----      | -----      | -----      | -----      | -----      | -----      | -----      | -----       |
| LILRA6*06 | -----      | -----      | -----      | -----      | -----      | -----      | -----      | -----      | -----G-    | -----       |
| LILRA6*07 | -----      | -----      | -----      | -----      | -CG-----   | -----T---  | -----CA    | -----      | -----      | -----       |
| LILRA6*08 | -----      | -----      | -----      | -----      | -CG-----   | -----      | -----      | -----      | -----      | -----       |
| LILRA6*09 | -----      | -----      | -----      | -----      | -----      | -----      | -----      | -----      | -----      | -----       |
| LILRA6*10 | -----      | -----      | -----      | -----      | -CT-----   | -----      | -----      | -----      | -----      | -----       |
| LILRA6*11 | -----      | -----      | -----      | -----      | -----      | -----      | -----      | -----      | -----      | -----       |
| LILRA6*12 | -----      | -----      | -----      | -----      | -CG-----   | -----T---  | -----CA    | -----      | -----      | -----       |
| LILRA6*13 | -----      | -----      | -----      | -----      | -----      | -----      | -----      | -----      | -----      | -----       |

1300

|           | Exon 7     |            |            |            |            | Exon 8     |            |            |            |            |  |
|-----------|------------|------------|------------|------------|------------|------------|------------|------------|------------|------------|--|
| LILRB3*01 | AGGACACTCT | GGAGGCTCCA | GCCTCCCACC | CACAGGGCCG | CCCTCCACAC | CTGGTCTGGG | AAGATACCTG | GAGGTTTTGA | TTGGGGTCTC | GGTGGCCTTC |  |
| LILRB3*02 | -----      | -----      | -----      | -----      | -----      | -----      | -----      | -----      | -----      | -----      |  |
| LILRB3*03 | -----      | -----      | -----      | -----      | -----      | -----      | -----      | -----      | -----      | -----      |  |
| LILRB3*04 | -----      | -----      | -----      | -----      | -----      | -----      | -----      | -----      | -----      | -----      |  |
| LILRB3*05 | -----      | -----      | -----      | -----      | -----      | -----      | -----      | -----      | -----      | -----      |  |
| LILRB3*06 | -----      | -----      | -----      | -----      | -----      | -----      | -----      | -----      | -----      | -----      |  |
| LILRB3*07 | -----      | -----      | -----      | -----      | -----      | -----      | -----      | -----      | -----      | -----      |  |
| LILRB3*08 | -----      | -----      | -----      | -----      | -----      | -----      | -----      | -----      | -----      | -----      |  |
| LILRB3*09 | -----      | -----      | -----      | -----      | -----      | -----      | -----      | -----      | -----      | -----      |  |
| LILRB3*10 | -----      | -----      | -----      | -----      | -----      | -----      | -----      | -----      | -----      | -----      |  |
| LILRB3*11 | -----      | -----      | -----      | -----      | -----      | -----      | -----      | -----      | -----      | -----      |  |
| LILRB3*12 | -----      | -----      | -----      | -----      | -----      | -----      | -----      | -----      | -----      | -----      |  |
| LILRB3*13 | -----      | -----      | -----      | -----      | -----      | -----      | -----      | -----      | -----      | -----      |  |

|           |             |       |       |       |       |         |            |            |            |            |
|-----------|-------------|-------|-------|-------|-------|---------|------------|------------|------------|------------|
| LILRA6*01 | -----       | ----- | ----- | ----- | ----- | CCTCACA | CGCCAAGGAT | TACACAGTGG | AGAATCTCAT | CCGCATGGGC |
| LILRA6*02 | -----       | ----- | ----- | ----- | ----- | -----   | -----      | -----      | -----      | -----      |
| LILRA6*03 | -----       | ----- | ----- | ----- | ----- | -----   | -----      | -----      | -----      | -----      |
| LILRA6*04 | -----C----- | ----- | ----- | ----- | ----- | -----   | -----      | -----      | -----      | -----      |
| LILRA6*05 | -----       | ----- | ----- | ----- | ----- | -----   | -----      | -----      | -----      | -----      |
| LILRA6*06 | -----       | ----- | ----- | ----- | ----- | -----   | -----      | -----      | -----      | -----      |
| LILRA6*07 | -----       | ----- | ----- | ----- | ----- | -----   | -----      | -----      | -----      | -----      |
| LILRA6*08 | -----       | ----- | ----- | ----- | ----- | -----   | -----      | -----      | -----      | -----      |
| LILRA6*09 | -----       | ----- | ----- | ----- | ----- | -----   | -----      | -----      | -----      | -----      |
| LILRA6*10 | -----       | ----- | ----- | ----- | ----- | -----   | -----      | -----      | -----      | -----      |
| LILRA6*11 | -----       | ----- | ----- | ----- | ----- | -----   | -----      | -----      | -----      | -----      |
| LILRA6*12 | -----       | ----- | ----- | ----- | ----- | -----   | -----      | -----      | -----      | -----      |
| LILRA6*13 | -----       | ----- | ----- | ----- | ----- | -----   | -----      | -----      | -----      | -----      |

1400

|           |            |            |            |            |            |            |            | Exon 9     |            |            |
|-----------|------------|------------|------------|------------|------------|------------|------------|------------|------------|------------|
| LILRB3*01 | GTCCTGCTGC | TCTTCCTCCT | CCTCTTCCTC | CTCCTCCGAC | GTCAGCGTCA | CAGCAAACAC | AGGACATCTG | ACCAGAGAAA | GACTGATTTT | CAGCGTCTTG |
| LILRB3*02 | -----      | -----      | -----      | -----      | -----      | -----      | -----      | -----      | -----      | -----      |
| LILRB3*03 | -----      | -----      | -----      | -----      | -----      | -----      | -----      | -----      | -----      | -----      |
| LILRB3*04 | -----      | -----      | -----      | -----      | -----      | -----      | -----      | -----      | -----      | -----      |
| LILRB3*05 | -----      | -----      | -----      | -----      | -----      | -----      | -----      | -----      | -----      | -----      |
| LILRB3*06 | -----      | -----      | -----      | -----      | -----      | -----      | -----      | -----      | -----      | -----      |
| LILRB3*07 | -----      | -----      | -----      | -----      | -----      | -----      | -----      | -----      | -----      | -----      |
| LILRB3*08 | -----      | -----      | -----      | -----      | -----      | -----      | -----      | -----      | -----      | -----      |
| LILRB3*09 | -----      | -----      | -----      | -----      | -----      | -----      | -----      | -----      | -----      | -----      |
| LILRB3*10 | -----      | -----      | -----      | -----      | -----      | -----      | -----      | -----      | -----      | -----      |
| LILRB3*11 | -----      | -----      | -----      | -----      | -----      | -----      | -----      | -----      | -----      | -----      |
| LILRB3*12 | -----      | -----      | -----      | -----      | -----      | -----      | -----      | -----      | -----      | -----      |
| LILRB3*13 | -----      | -----      | -----      | -----      | -----      | -----      | -----      | -----      | -----      | -----      |

|           |            |           |           |            |            |            |            |            |            |            |
|-----------|------------|-----------|-----------|------------|------------|------------|------------|------------|------------|------------|
| LILRA6*01 | ATGGCAGGCT | TGGTCTGGT | GTCCTCGGG | ATTCTGTTAT | TTGAGGCTCA | GCACAGCCAG | AGAAACCCCC | AAGATGCAGC | CGGGAGGTGA | ACAGCGGAGA |
| LILRA6*02 | -----      | -----     | -----     | -----      | -----      | -----      | -----      | -----      | -----      | -----      |
| LILRA6*03 | -----      | -----     | -----     | -----      | -----      | -----      | -----      | -----      | -----      | -----      |
| LILRA6*04 | -----      | -----     | -----     | -----      | -----      | -----      | -----      | -----      | -----      | -----      |
| LILRA6*05 | -----      | -----     | -----     | -----      | -----      | -----      | -----      | -----      | -----      | -----      |
| LILRA6*06 | -----      | -----     | -----     | -----      | -----      | -----      | -----      | -----      | -----      | -----      |
| LILRA6*07 | -----      | -----     | -----     | -----      | -----      | -----      | -----      | -----      | -----      | -----      |
| LILRA6*08 | -----      | -----     | -----     | -----      | -----      | -----      | -----      | -----      | -----      | -----      |
| LILRA6*09 | -----      | -----     | -----     | -----      | -----      | -----      | -----      | -----      | -----      | -----      |
| LILRA6*10 | -----      | -----     | -----     | -----      | -----      | -----      | -----      | -----      | -----      | -----      |
| LILRA6*11 | -----      | -----     | -----     | -----      | -----      | -----      | -----      | -----      | -----      | -----      |
| LILRA6*12 | -----      | -----     | -----     | -----      | -----      | -----      | -----      | -----      | -----      | -----      |
| LILRA6*13 | -----      | -----     | -----     | -----      | -----      | -----      | -----      | -----      | -----      | -----      |

1500

|           | Exon 10    |            |            |            |           |           | Exon 11    |            |            |            |
|-----------|------------|------------|------------|------------|-----------|-----------|------------|------------|------------|------------|
| LILRB3*01 | CAGGGGCTGC | GGAGACAGAG | CCCAAGGACA | GGGGCCTGCT | GAGGAGTCC | AGCCAGCTG | CTGACGTCCA | GGAAGAAAAC | CTCTATGCTG | CCGTGAAGGA |
| LILRB3*02 | -----      | -----      | -----      | -----      | -----     | -----     | -----      | -----      | -----      | -----      |
| LILRB3*03 | -----      | -----      | -----      | -----      | -----     | -----     | -----      | -----      | -----      | -----      |
| LILRB3*04 | -----      | -----      | -----      | -----      | -----     | -----     | -----      | -----      | -----      | -----      |
| LILRB3*05 | -----      | -----      | -----      | -----      | -----     | -----     | -----      | -----      | -----      | -T-----    |
| LILRB3*06 | -----      | -----      | -----      | -----      | -----     | -----     | -----      | -----      | -----      | -----      |
| LILRB3*07 | -----      | -----      | -----      | -----      | -----     | -----     | -----      | -----      | -----      | -----      |
| LILRB3*08 | -----      | -----      | -----      | -----      | -----     | -----     | -----      | -----      | -----      | -----      |
| LILRB3*09 | -----      | -----      | -----      | -----      | -----     | -----     | -----      | -----      | -----      | -----      |
| LILRB3*10 | -----      | -----      | -----      | -----      | -----     | -----     | -----      | -----      | -----      | -T-----    |
| LILRB3*11 | -----      | -----      | -----      | -----      | -----     | -----     | -----      | -----      | -----      | -----      |
| LILRB3*12 | -----      | -----      | -----      | -----      | -----     | -----     | -----      | -----      | -----      | -----      |
| LILRB3*13 | -----      | -----      | -----      | -----      | -----     | -----     | -----      | -----      | -----      | -T-----    |

1600

|           |            |           |
|-----------|------------|-----------|
| LILRA6*01 | GGACAATGCA | CCCT      |
| LILRA6*02 | -----      | ----      |
| LILRA6*03 | -----      | ----      |
| LILRA6*04 | -----      | ----      |
| LILRA6*05 | -----      | ----      |
| LILRA6*06 | -----      | ----      |
| LILRA6*07 | -----      | ----      |
| LILRA6*08 | -----      | ----      |
| LILRA6*09 | -----      | ----      |
| LILRA6*10 | -----      | ----      |
| LILRA6*11 | -----      | ----      |
| LILRA6*12 | -----      | ----      |
| LILRA6*13 | -----      | ---- 1614 |

Exon 12

|           |            |             |            |            |            |            |             |            |            |            |
|-----------|------------|-------------|------------|------------|------------|------------|-------------|------------|------------|------------|
| LILRB3*01 | CACACAGTCT | GAGGACAGGG  | TGGAGCTGGA | CAGTCAGAGC | CCACACGATG | AAGACCCCCA | GGCAGTGACG  | TATGCCCCGG | TGAAACACTC | CAGTCCTAGG |
| LILRB3*02 | -----      | -----       | -----      | -----      | -----      | -----      | -----       | -----      | -----      | -----      |
| LILRB3*03 | -----      | -----G----- | -----      | -----      | -----      | -----      | -----C----- | -----      | -----      | -----      |
| LILRB3*04 | -----      | -----       | -----      | -----      | -----      | -----      | -----       | -----      | -----      | -----      |
| LILRB3*05 | -----      | -----       | -----      | -----      | -----      | -----      | -----       | -----      | -----      | -----      |
| LILRB3*06 | -----      | -----G----- | -----      | -----      | -----      | -----      | -----C----- | -----      | -----      | -----      |
| LILRB3*07 | -----      | -----       | -----      | -----      | -----      | -----      | -----       | -----      | -----      | -----      |
| LILRB3*08 | -----      | -----       | -----      | -----      | -----      | -----      | -----       | -----      | -----      | -----      |
| LILRB3*09 | -----      | -----       | -----      | -----      | -----      | -----      | -----       | -----      | -----      | -----      |
| LILRB3*10 | -----      | -----       | -----      | -----      | -----      | -----      | -----       | -----      | -----      | -----      |
| LILRB3*11 | -----      | -----       | -----      | -----      | -----      | -----      | -----       | -----      | -----      | -----      |
| LILRB3*12 | -----      | -----G----- | -----      | -----      | -----      | -----      | -----C----- | -----      | -----      | -----      |
| LILRB3*13 | -----      | -----       | -----      | -----      | -----      | -----      | -----       | -----      | -----      | -----      |

1700

Exon 13

|           |            |            |                   |            |            |            |              |             |            |            |
|-----------|------------|------------|-------------------|------------|------------|------------|--------------|-------------|------------|------------|
| LILRB3*01 | AGAGAAATGG | CCTCTCCTCC | CTCCTCACTG        | TCTGGGGAAT | TCCTGGACAC | AAAGGACAGA | CAGGTGGAAG   | AGGACAGGCA  | GATGGACACT | GAGSCTGCTG |
| LILRB3*02 | -----      | -----      | -----             | -----      | -----      | -----      | -----        | -----       | -----      | -----      |
| LILRB3*03 | -----      | -----      | -----T-----C----- | -----      | -----      | -----      | -----CA----- | -----A----- | -----      | -----      |
| LILRB3*04 | -----      | -----      | -----             | -----      | -----      | -----      | -----        | -----       | -----      | -----      |
| LILRB3*05 | -----      | -----      | -----             | -----      | -----      | -----      | -----        | -----       | -----      | -----      |
| LILRB3*06 | -----      | -----      | -----T-----C----- | -----      | -----      | -----      | -----CA----- | -----A----- | -----      | -----      |
| LILRB3*07 | -----      | -----      | -----             | -----      | -----      | -----      | -----        | -----       | -----      | -----      |
| LILRB3*08 | -----      | -----      | -----             | -----      | -----      | -----      | -----        | -----       | -----      | -----      |
| LILRB3*09 | -----      | -----      | -----             | -----      | -----      | -----      | -----        | -----       | -----      | -----      |
| LILRB3*10 | -----      | -----      | -----             | -----      | -----      | -----      | -----        | -----       | -----      | -----      |
| LILRB3*11 | -----      | -----      | -----             | -----      | -----      | -----      | -----        | -----       | -----      | -----      |
| LILRB3*12 | -----      | -----      | -----T-----C----- | -----      | -----      | -----      | -----CA----- | -----A----- | -----      | -----      |
| LILRB3*13 | -----      | -----      | -----             | -----      | -----      | -----      | -----        | -----       | -----      | -----      |

1800

|           |              |
|-----------|--------------|
| LILRB3*01 | CATCTGAAGC C |
| LILRB3*02 | ----- -      |
| LILRB3*03 | ----- -      |
| LILRB3*04 | ----- -      |
| LILRB3*05 | ----- -      |
| LILRB3*06 | ----- -      |
| LILRB3*07 | ----- -      |
| LILRB3*08 | ----- -      |
| LILRB3*09 | ----- -      |
| LILRB3*10 | ----- -      |
| LILRB3*11 | ----- -      |
| LILRB3*12 | ----- -      |
| LILRB3*13 | ----- - 1811 |

**Figure S2.** Alignment of amino acid sequences encoded by the alleles shown in Figure S1. Only unique sequences are presented. The following groups of alleles encode identical proteins: *LILRB3\*05/10/13*, *LILRB3\*03/12*, *LILRA6\*01/13*, and *LILRA\*03/05/06/09*. *LILRB3* sequences are missing a 42 aa fragment at the N-terminus whereas *LILRA6* sequences are complete. The *LILRA6* fragment that is not homologous to *LILRB3* is shown in red. Domains and motifs are highlighted in yellow.

|           | SIGNAL        |       |             | D1         |            |            |            |            |            |            |            |
|-----------|---------------|-------|-------------|------------|------------|------------|------------|------------|------------|------------|------------|
| LILRB3*01 | MTPAL         | TALLC | LGLSLGPRTR  | VQAGPFPKPT | LWAEPGSVIS | WGSPVTIWCQ | GSLEAQEYRL | DKEGSPEPLD | RNNPLEPKNK | ARFSIPSMTE | HHAGRYRCHY |
| LILRB3*02 | -----         | ----- | -----       | -----      | -----      | -----      | -----      | -----      | -----      | -----      | -----      |
| LILRB3*03 | -----         | ----- | -----       | -----      | -----      | -----      | -----Q-    | -----      | -----      | -----Q     | -----      |
| LILRB3*04 | -----         | ----- | -----       | M-----     | -----      | -----      | -----Q-    | -----W-    | -----      | -----Q     | -----      |
| LILRB3*05 | -----         | ----- | -----       | M-----     | -----      | -----      | -----Q-    | -----W-    | -----      | -----Q     | -----      |
| LILRB3*06 | -----A-----   | ----- | -----H----- | -----      | -----      | -----      | -----      | -----W-    | -----      | -----I-    | -----      |
| LILRB3*07 | -----         | ----- | -----       | -----      | -----      | -----      | -----Q-    | -----W-    | -----      | -----Q     | -----      |
| LILRB3*08 | -----         | ----- | -----       | -----      | -----      | -----      | -----Q-    | -----W-    | -----      | -----Q     | -----      |
| LILRB3*09 | -----T-A----- | ----- | -----H----- | -----      | -----      | -----      | -----      | -----W-    | -----      | -----I-    | -----      |
| LILRB3*11 | -----         | ----- | -----       | -----      | -----      | -----      | -----      | -----      | -----      | -----      | -----      |
| LILRA6*01 | -----         | ----- | -----       | -----      | -----      | -----      | -----Q-    | -----      | -----      | -----Q     | -----      |
| LILRA6*02 | -----T-A----- | ----- | -----H----- | -----      | -----      | -----      | -----      | -----W-    | -----      | -----I-    | -----      |
| LILRA6*03 | -----         | ----- | -----       | -----      | -----      | -----      | -----Q-    | -----      | -----      | -----Q     | -----      |
| LILRA6*04 | -----         | ----- | -----       | -----      | -----      | -----      | -----Q-    | -----W-    | -----      | -----Q     | -----      |
| LILRA6*07 | -----         | ----- | -----       | -----      | -----      | -----      | -----      | -----      | -----      | -----Q     | -----      |
| LILRA6*08 | -----         | ----- | -----       | -----      | -----      | -----      | -----Q-    | -----      | -----      | -----Q     | -----      |
| LILRA6*10 | -----A-----   | ----- | -----H----- | -----      | -----      | -----      | -----      | -----      | -----      | -----      | -----      |
| LILRA6*11 | -----         | ----- | -----       | -----      | -----      | -----      | -----Q-    | -----      | -----      | -----      | -----      |
| LILRA6*12 | -----         | ----- | -----       | -----      | -----      | -----      | -----Q-    | -----      | -----      | -----Q     | -----      |

100

|           | D2         |         |       |            |            |            |            |            |            |          |         |            |
|-----------|------------|---------|-------|------------|------------|------------|------------|------------|------------|----------|---------|------------|
| LILRB3*01 | YSSAGWSEPS | DPLELVM | TGF   | YNKPTLSALP | SPVVASGGNM | TLRCGSQKGY | HHFVLMKEGE | HQLPRTLDSQ | QLHSGGFQAL | FPVGPVNP | SH      | RWRFTCYYYY |
| LILRB3*02 | -----      | -----   | ----- | -----      | -----      | -----      | -----      | -----      | -----      | -----    | -----   | -----      |
| LILRB3*03 | -----      | -----   | ----- | A-S-----   | -----      | -----R-    | -----      | -----      | -----      | -----    | -----   | -----      |
| LILRB3*04 | -----      | -----   | ----- | -----      | -----      | -----      | -----      | -----      | -----      | -----    | -----T- | -----      |
| LILRB3*05 | -----      | -----   | ----- | -----      | -----      | -----      | -----      | -----      | -----      | -----    | -----T- | -----      |
| LILRB3*06 | -----      | -----   | ----- | A-S-----   | -----      | -----Q-    | -----      | -----      | -----      | -----    | -----   | -----      |
| LILRB3*07 | -----      | -----   | ----- | -----      | -----      | -----      | -----      | -----      | -----      | -----    | -----T- | -----      |
| LILRB3*08 | -----      | -----   | ----- | -----      | -----      | -----      | -----      | -----      | -----      | -----    | -----T- | -----      |
| LILRB3*09 | -----      | -----   | ----- | A-S-----   | -----      | -----Q-    | -----      | -----      | -----      | -----    | -----   | -----      |
| LILRB3*11 | -----      | -----   | ----- | -----      | -----      | -----      | -----      | -----      | -----      | -----    | -----   | -----      |
| LILRA6*01 | -----      | -----   | ----- | T-----     | -----      | -----      | -----      | -----      | -----      | -----    | -----T- | -----      |
| LILRA6*02 | -----      | -----   | ----- | A-S-----   | -----      | -----Q-    | -----      | -----      | -----      | -----    | -----   | -----      |
| LILRA6*03 | -----      | -----   | ----- | -----      | -----      | -----      | -----      | -----      | -----      | -----    | -----T- | -----      |
| LILRA6*04 | -----      | -----   | ----- | -----      | -----      | -----      | -----      | -----      | -----      | -----    | -----T- | -----      |
| LILRA6*07 | -----      | -----   | ----- | A-S-----   | -----      | -----      | D-----     | -----      | -----      | -----    | -----T- | -----      |
| LILRA6*08 | -----      | -----   | ----- | T-----     | -----      | -----      | -----      | -----      | -----      | -----    | -----T- | -----      |
| LILRA6*10 | -----      | -----   | ----- | A-S-----   | -----      | -----      | -----      | -----      | -----      | -----    | -----T- | -----      |
| LILRA6*11 | -----      | -----   | ----- | A-S-----   | -----      | -----      | D-----     | -----      | -----      | -----    | -----T- | -----      |
| LILRA6*12 | -----      | -----   | ----- | -----      | -----      | -----      | -----      | -----      | -----      | -----    | -----T- | -----      |

200

D3

|           | MNTPQVWSHP | SDPLEILPSG | VSRKPSLTL | QGPVLAPQS | LTLQCGSDVG | YDRFVLYKEG | ERDFLQRPQ | QPQAGLSQAN | FTLGPVSRSH | GGQYRCYGAH |
|-----------|------------|------------|-----------|-----------|------------|------------|-----------|------------|------------|------------|
| LILRB3*01 | -----      | -----      | -----     | -----     | -----      | -----      | -----     | -----      | -----      | -----      |
| LILRB3*02 | -----      | -----      | -----     | -----     | -----      | -----      | -----     | -----      | P--        | -----      |
| LILRB3*03 | ---R---    | -----      | -----     | -----     | -----      | -----      | -----     | -----      | P-N        | -----      |
| LILRB3*04 | T---W---   | -----      | -----     | -----     | -----      | -----      | -----     | -----      | P-N        | -----      |
| LILRB3*05 | T---W---   | -----      | -----     | -----     | -----      | -----      | -----     | -----      | Y          | -----      |
| LILRB3*06 | ---R---    | -----      | -----     | -----     | -----      | -----      | -----     | -----      | P--        | -----      |
| LILRB3*07 | T---R---   | -----      | -----     | -----     | -----      | -----      | -----     | -----      | Y          | -----      |
| LILRB3*08 | T---R---   | -----      | -----     | -----     | -----      | -----      | -----     | -----      | Y          | -----      |
| LILRB3*09 | ---R---    | -----      | -----     | -----     | -----      | -----      | -----     | -----      | P--        | -----      |
| LILRB3*11 | ---R---    | -----      | -----     | -----     | -----      | -----      | -----     | -----      | P--        | -----      |
| LILRA6*01 | T---R---   | -----      | -----     | -----     | -----      | -----      | -----     | -----      | P--        | -----      |
| LILRA6*02 | ---R---    | -----      | -----     | -----     | -----      | -----      | -----     | -----      | P--        | -----      |
| LILRA6*03 | T---R---   | -----      | -----     | -----     | -----      | -----      | -----     | -----      | P--        | -----      |
| LILRA6*04 | T---W---   | -----      | -----     | -----     | -----      | -----      | -----     | -----      | P--        | -----      |
| LILRA6*07 | -----      | -----      | -----     | -----     | -----      | -----      | -----     | -----      | P--        | -----      |
| LILRA6*08 | T---R---   | -----      | -----     | -----     | -----      | -----      | -----     | -----      | P--        | -----      |
| LILRA6*10 | T-----     | -----      | -----     | -----     | -----      | -----      | -----     | -----      | -----      | -----      |
| LILRA6*11 | T---R---   | -----      | -----     | -----     | -----      | -----      | -----     | -----      | P--        | -----      |
| LILRA6*12 | T-----     | -----      | -----     | -----     | -----      | -----      | -----     | -----      | P--        | -----      |

300

D4

|           | NLSSEWSAPS | DPLN  | IILMAGQ | IYDTVLSAQ | PGPTVASGEN | VTLLCQSWWQ | FDTFLLTKEG | AAHPPLRLRS | MYGAHKYQAE | FPMSPV TSAH | AGTYRCYGSY |
|-----------|------------|-------|---------|-----------|------------|------------|------------|------------|------------|-------------|------------|
| LILRB3*01 | -----      | ----- | -----   | -----     | -----      | -----      | -----      | -----      | -----      | -----       | -----      |
| LILRB3*02 | -----      | ----- | -----   | -----     | -----      | -----      | -----      | -----      | -----      | -----       | -----      |
| LILRB3*03 | -----      | ----- | -----   | -----     | -----      | -----      | -----      | -----      | -----      | -----       | -----R     |
| LILRB3*04 | -----      | ----- | -----   | -----     | -----      | -----      | -----      | -----      | -----      | -----       | -----R     |
| LILRB3*05 | -----      | --D-- | IT--    | -----     | -----      | M-----     | RGY        | -----      | -----      | -----       | -----R     |
| LILRB3*06 | -----      | ----- | -----   | -----     | -----      | -----      | -----      | -----      | -----      | -----       | -----      |
| LILRB3*07 | -----      | --D-- | IT--    | -----     | -----      | -----      | -----      | -----      | -----      | -----       | -----R     |
| LILRB3*08 | -----      | --D-- | IT--    | -----     | -----      | M-----     | RGY        | -----      | -----      | -----       | -----      |
| LILRB3*09 | -----      | ----- | -----   | -----     | -----      | -----      | -----      | -----      | -----      | -----       | -----R     |
| LILRB3*11 | -----      | ----- | -----   | -----     | -----      | -----      | -----      | -----      | -----      | -----       | -----      |
| LILRA6*01 | -----      | ----- | -----   | -----     | -----      | -----      | RGY        | -----      | -----      | -----       | -----      |
| LILRA6*02 | -----      | ----- | -----   | -----     | -----      | -----      | -----      | -----      | -----      | -----       | -----      |
| LILRA6*03 | -----      | ----- | -----   | -----     | -----      | -----      | RGY        | -----      | -----      | -----       | -----      |
| LILRA6*04 | -----      | ----- | -----   | -----     | -----      | -----      | RGY        | -----      | -----      | -----       | -----R     |
| LILRA6*07 | -----      | ----- | -----   | -----     | -----      | -----      | -----      | -----      | -----      | -----       | -----R     |
| LILRA6*08 | -----      | ----- | -----   | -----     | -----      | -----      | RGY        | -----      | -----      | -----       | -----R     |
| LILRA6*10 | .....      | ..... | -----   | -----     | -----      | -----      | -----      | -----      | -----      | -----       | -----L     |
| LILRA6*11 | -----      | ----- | -----   | -----     | -----      | -----      | -----      | -----      | -----      | -----       | -----      |
| LILRA6*12 | -----      | ----- | -----   | -----     | -----      | -----      | RGY        | -----      | -----      | -----       | -----R     |

400

|           | TRANSMEMBRANE |        |       |       |       |        |       |       |       |        |       |       |       |        |       |        |       |        |       |        |
|-----------|---------------|--------|-------|-------|-------|--------|-------|-------|-------|--------|-------|-------|-------|--------|-------|--------|-------|--------|-------|--------|
| LILRB3*01 | SSNP          | HLLSFP | SEPLE | LMVSG | HSGG  | SSLPPT | GPPST | PGLGR | YLEV  | LIGVSV | AFVLL | LFLLL | FLL   | RRQRHS | KHRT  | SQQRKT | DFOR  | PAGAAE | TEPK  | DRGLLR |
| LILRB3*02 | -----         | H-     | ----- | ----- | ----- | -----  | ----- | ----- | ----- | -----  | ----- | ----- | ----- | -----  | ----- | -----  | ----- | -----  | ----- | -----  |
| LILRB3*03 | ---Y---       | H-     | ----- | V---  | ----- | -----  | ----- | ----- | ----- | -----  | ----- | ----- | ----- | -----  | ----- | -----  | ----- | -----  | ----- | -----  |
| LILRB3*04 | -----         | H-     | ----- | V---  | ----- | -----  | ----- | ----- | ----- | -----  | ----- | ----- | ----- | -----  | ----- | -----  | ----- | -----  | ----- | -----  |
| LILRB3*05 | -----         | -----  | ----- | ----- | ----- | -----  | ----- | ----- | ----- | -----  | ----- | ----- | ----- | -----  | ----- | -----  | ----- | -----  | ----- | -----  |
| LILRB3*06 | -----         | -----  | ----- | ----- | ----- | -----  | ----- | ----- | ----- | -----  | ----- | ----- | ----- | -----  | ----- | -----  | ----- | -----  | ----- | -----  |
| LILRB3*07 | -----         | H-     | ----- | ----- | ----- | -----  | ----- | ----- | ----- | -----  | ----- | ----- | ----- | -----  | ----- | -----  | ----- | -----  | ----- | -----  |
| LILRB3*08 | ---Y---       | -----  | ----- | V---  | ----- | -----  | ----- | ----- | ----- | -----  | ----- | ----- | ----- | -----  | ----- | -----  | ----- | -----  | ----- | -----  |
| LILRB3*09 | -----         | -----  | ----- | ----- | ----- | -----  | ----- | ----- | ----- | -----  | ----- | ----- | ----- | -----  | ----- | -----  | ----- | -----  | ----- | -----  |
| LILRB3*11 | -----         | -----  | ----- | ----- | ----- | -----  | ----- | ----- | ----- | -----  | ----- | ----- | ----- | -----  | ----- | -----  | ----- | -----  | ----- | -----  |

500

|           | TRANSMEMBRANE |       |       |       |       |       |       |       |       |       |       |       |       |       |       |       |       |       |       |       |
|-----------|---------------|-------|-------|-------|-------|-------|-------|-------|-------|-------|-------|-------|-------|-------|-------|-------|-------|-------|-------|-------|
| LILRA6*01 | -----         | ----- | ----- | ----- | ----- | ----- | ----- | ----- | ----- | ----- | ----- | ----- | ----- | ----- | ----- | ----- | ----- | ----- | ----- | ----- |
| LILRA6*02 | -----         | ----- | ----- | ----- | ----- | ----- | ----- | ----- | ----- | ----- | ----- | ----- | ----- | ----- | ----- | ----- | ----- | ----- | ----- | ----- |
| LILRA6*03 | -----         | ----- | ----- | ----- | ----- | ----- | ----- | ----- | ----- | ----- | ----- | ----- | ----- | ----- | ----- | ----- | ----- | ----- | ----- | ----- |
| LILRA6*04 | -----         | H-    | ----- | P     | ----- | ----- | ----- | ----- | ----- | ----- | ----- | ----- | ----- | ----- | ----- | ----- | ----- | ----- | ----- | ----- |
| LILRA6*07 | ---Y---       | H-    | ----- | ----- | ----- | ----- | ----- | ----- | ----- | ----- | ----- | ----- | ----- | ----- | ----- | ----- | ----- | ----- | ----- | ----- |
| LILRA6*08 | -----         | ----- | ----- | ----- | ----- | ----- | ----- | ----- | ----- | ----- | ----- | ----- | ----- | ----- | ----- | ----- | ----- | ----- | ----- | ----- |
| LILRA6*10 | -----         | ----- | ----- | ----- | ----- | ----- | ----- | ----- | ----- | ----- | ----- | ----- | ----- | ----- | ----- | ----- | ----- | ----- | ----- | ----- |
| LILRA6*11 | -----         | ----- | ----- | ----- | ----- | ----- | ----- | ----- | ----- | ----- | ----- | ----- | ----- | ----- | ----- | ----- | ----- | ----- | ----- | ----- |
| LILRA6*12 | ---Y---       | H-    | ----- | ----- | ----- | ----- | ----- | ----- | ----- | ----- | ----- | ----- | ----- | ----- | ----- | ----- | ----- | ----- | ----- | ----- |

481

|           | ITIM-like |       | ITIM   |       |       |       |       |       |       |       |       |       |       |       |       |       |       |       |       |       |
|-----------|-----------|-------|--------|-------|-------|-------|-------|-------|-------|-------|-------|-------|-------|-------|-------|-------|-------|-------|-------|-------|
| LILRB3*01 | RSSPA     | ADVQE | ENLYAA | VKDT  | QSEDR | VELDS | QSPHE | DEPOA | VTYAP | VKHSS | PREMA | SPPS  | SLSGE | FLDTK | DRQVE | EDROM | DTEAA | ASEA  |       |       |
| LILRB3*02 | -----     | ----- | -----  | ----- | ----- | ----- | ----- | ----- | ----- | ----- | ----- | ----- | ----- | ----- | ----- | ----- | ----- | ----- | ----- | ----- |
| LILRB3*03 | -----     | ----- | -----  | G     | ----- | H-    | ----- | ----- | ----- | ----- | ----- | P     | ----- | ----- | ----- | A     | ----- | ----- | ----- | ----- |
| LILRB3*04 | -----     | ----- | -----  | ----- | ----- | ----- | ----- | ----- | ----- | ----- | ----- | ----- | ----- | ----- | ----- | ----- | ----- | ----- | ----- | ----- |
| LILRB3*05 | -----     | ----- | -----  | ----- | ----- | ----- | ----- | ----- | ----- | ----- | ----- | ----- | ----- | ----- | ----- | ----- | ----- | ----- | ----- | ----- |
| LILRB3*06 | -----     | ----- | -----  | G     | ----- | H-    | ----- | ----- | ----- | ----- | ----- | P     | ----- | ----- | ----- | A     | ----- | ----- | ----- | ----- |
| LILRB3*07 | -----     | ----- | -----  | ----- | ----- | ----- | ----- | ----- | ----- | ----- | ----- | ----- | ----- | ----- | ----- | ----- | ----- | ----- | ----- | ----- |
| LILRB3*08 | -----     | ----- | -----  | ----- | ----- | ----- | ----- | ----- | ----- | ----- | ----- | ----- | ----- | ----- | ----- | ----- | ----- | ----- | ----- | ----- |
| LILRB3*09 | -----     | ----- | -----  | ----- | ----- | ----- | ----- | ----- | ----- | ----- | ----- | ----- | ----- | ----- | ----- | ----- | ----- | ----- | ----- | ----- |
| LILRB3*11 | -----     | ----- | -----  | ----- | ----- | ----- | ----- | ----- | ----- | ----- | ----- | ----- | ----- | ----- | ----- | ----- | ----- | ----- | ----- | ----- |
| LILRB3*12 | -----     | ----- | -----  | G     | ----- | H-    | ----- | ----- | ----- | ----- | ----- | P     | ----- | ----- | ----- | A     | ----- | ----- | ----- | ----- |

599



**Table S1.** Primers and assays used in PCR

| <b>Primer/Assay</b> | <b>Sequence</b>            | <b>Comment</b>                                                                         |
|---------------------|----------------------------|----------------------------------------------------------------------------------------|
| ILT2                | TCTGTCCTGCCAGCACTGAG       | Exon 1, Forward                                                                        |
| ILT22               | GCGTAGGTCACATCCTGGGA       | Exon 13, LILRB3, Reverse                                                               |
| ILT26               | TGAGGCTCCACCACGCTGA        | Exon 8, LILRA6/LILRA2, 3'UTR, Reverse                                                  |
| ILT5                | CCGCTGCCACTATTACAGCT       | Exon 3, LILRB3/LILRA6, Forward                                                         |
| ILT55               | GCTTTCTGGACTATCTGTCG       | Exon 8, LILRA6, 3'UTR, Forward                                                         |
| ILT56               | GCCCTACTACCTCTGACATT       | Exon 8, LILRA6, 3'UTR, Reverse                                                         |
| ILT62               | ACACTCAGCAGAAGGAGA         | Exon 13, LILRB3, 3'UTR, Forward                                                        |
| ILT63               | CATCTTTGAGTCAGGTGAGT       | Exon 13, LILRB3, 3'UTR, Reverse                                                        |
| ZNF80_F             | CTGTGACCTGCAGCTCATCCT      | RTprimerDB #1021 ( <a href="http://www.rtprimerdb.org">http://www.rtprimerdb.org</a> ) |
| ZNF80_R             | TAAGTTCTCTGACGTTGACTGATGTG | RTprimerDB #1021 ( <a href="http://www.rtprimerdb.org">http://www.rtprimerdb.org</a> ) |
| GPR15_F             | GGTCCCTGGTGGCCTTAATT       | RTprimerDB #1022 ( <a href="http://www.rtprimerdb.org">http://www.rtprimerdb.org</a> ) |
| GPR15_R             | TTGCTGGTAATGGGCACACA       | RTprimerDB #1022 ( <a href="http://www.rtprimerdb.org">http://www.rtprimerdb.org</a> ) |
| LILRB3_CNV          | Hs04013741_cn              | intron 10, Taqman CNV, Applied Biosystems                                              |
| LILRA6_CNV          | Hs04034020_cn              | intron 7, Taqman CNV, Applied Biosystems                                               |

**Table S2.** *LILRB3* and *LILRA6* alleles and matching sequences in Genbank

| <b>Allele</b> | <b>GenBank Acc no (nt match)</b>                                                                                          |
|---------------|---------------------------------------------------------------------------------------------------------------------------|
| LILRB3*01     | BC104993 (26-1811), BC112198 (26-1811), AF344433 (115-1302)                                                               |
| LILRB3*02     | no match                                                                                                                  |
| LILRB3*03     | AF031556 (43-1811)                                                                                                        |
| LILRB3*04     | AF009641 (43-1811)                                                                                                        |
| LILRB3*05     | no match                                                                                                                  |
| LILRB3*06     | no match                                                                                                                  |
| LILRB3*07     | no match                                                                                                                  |
| LILRB3*08     | no match                                                                                                                  |
| LILRB3*09     | no match                                                                                                                  |
| LILRB3*10     | no match                                                                                                                  |
| LILRB3*11     | AF031553 (43-1811)                                                                                                        |
| LILRB3*12     | AF025533 (1-1811)                                                                                                         |
| LILRB3*13     | AF009639 (43-1811), EU915605 (14-1355), AF009643 (43-616, 703-1585, 1641-1811, alt. spliced)                              |
| LILRA*01      | no match                                                                                                                  |
| LILRA*02      | AF344432 (115-1302)                                                                                                       |
| LILRA*03      | NM_024318 (1-1514), AB463830 (41-1487), BC156794 (43-1488), BC141549 (43-1488), BC041708 (28-616, 703-1514, alt. spliced) |
| LILRA*04      | no match                                                                                                                  |
| LILRA*05      | no match                                                                                                                  |
| LILRA*06      | no match                                                                                                                  |
| LILRA*07      | no match                                                                                                                  |
| LILRA*08      | no match                                                                                                                  |
| LILRA*09      | AB463830 (41-1487), BC156794 (43-1488), BC141549 (43-1488), BC041708 (28-616, 703-1514, alt. spliced)                     |
| LILRA*10      | no match                                                                                                                  |
| LILRA*11      | no match                                                                                                                  |
| LILRA*12      | no match                                                                                                                  |
| LILRA*13      | no match                                                                                                                  |

Nt numbers in matching sequences correspond to the sequences shown in Figure S1. AF009641 (LILRB3\*04) represents an alternatively spliced form with a 3nt insertion at the exon 10-11 boundary.
